# Supplementary material for: Neuroprotective Effects of Aucubin against Cerebral Ischemia and Ischemia Injury through the Inhibition of the TLR4/NF-κB Inflammatory Signaling Pathway in Gerbils
Source: MDPI journal article supplement (doi:10.3390/ijms25063461), 2024-03-19
Supplement: s1 [file s1]

**Figure S1. IL1 $\beta$**

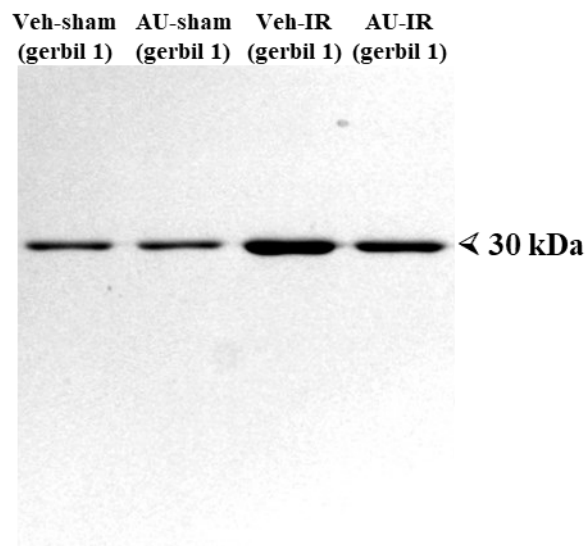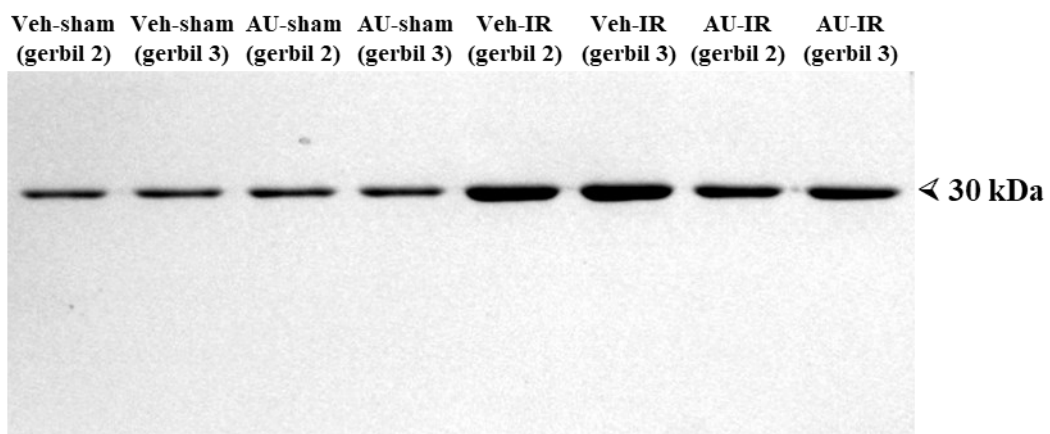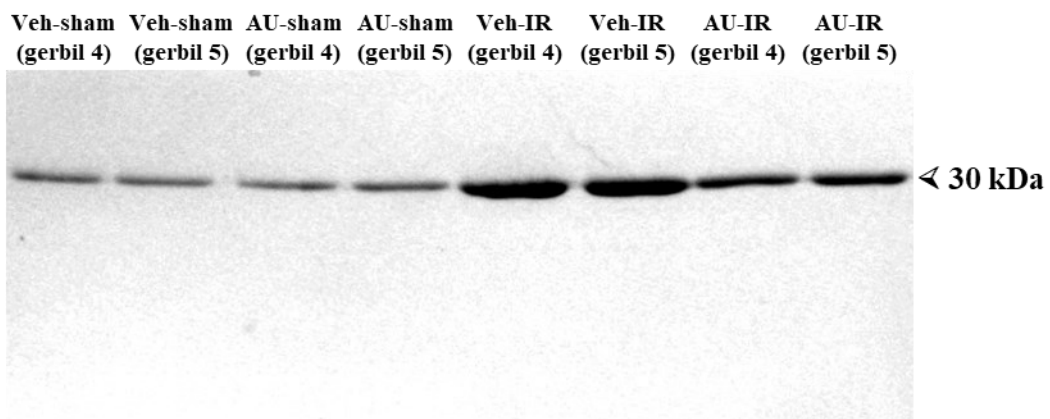

**Figure S2.  $\beta$ -actin for IL1 $\beta$**

**Veh-sham   AU-sham   Veh-IR   AU-IR**  
**(gerbil 1)   (gerbil 1)   (gerbil 1)   (gerbil 1)**

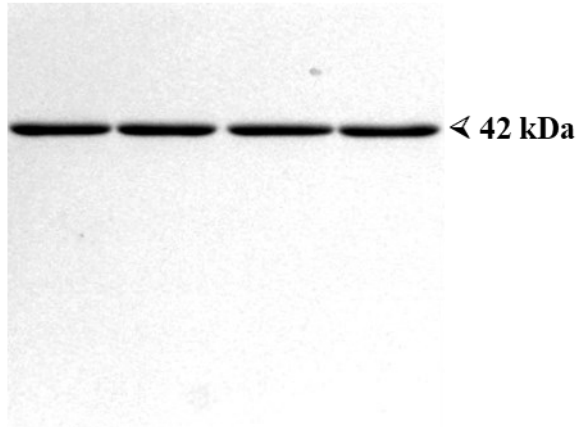

**Veh-sham   Veh-sham   AU-sham   AU-sham   Veh-IR   Veh-IR   AU-IR   AU-IR**  
**(gerbil 2)   (gerbil 3)   (gerbil 2)   (gerbil 3)   (gerbil 2)   (gerbil 3)   (gerbil 2)   (gerbil 3)**

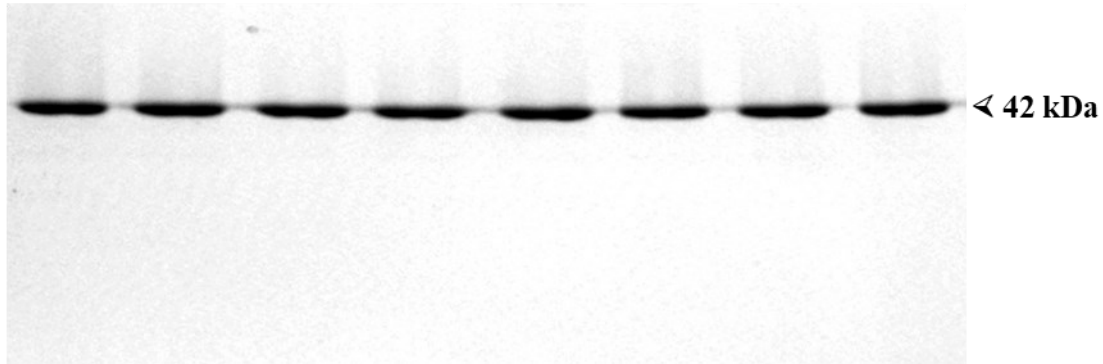

**Veh-sham   Veh-sham   AU-sham   AU-sham   Veh-IR   Veh-IR   AU-IR   AU-IR**  
**(gerbil 4)   (gerbil 5)   (gerbil 4)   (gerbil 5)   (gerbil 4)   (gerbil 5)   (gerbil 4)   (gerbil 5)**

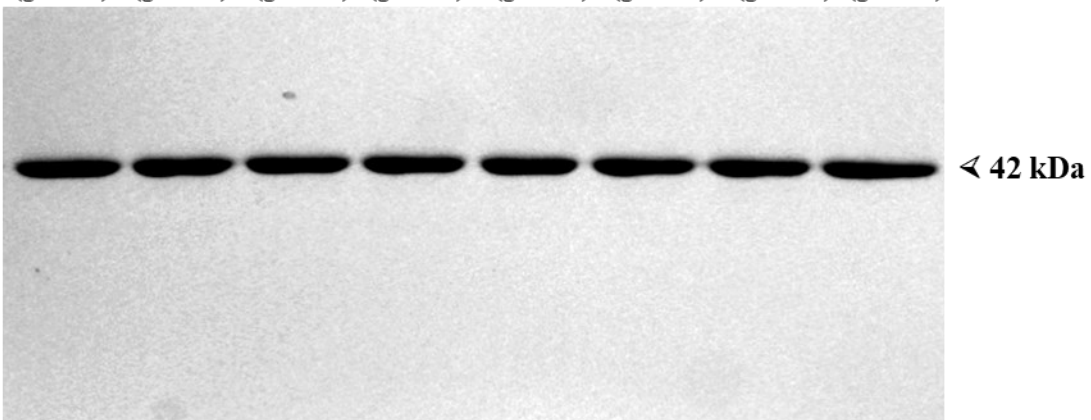

**Figure S3. TNF $\alpha$**

| <b>Veh-sham</b><br><b>(gerbil 1)</b> | <b>AU-sham</b><br><b>(gerbil 1)</b> | <b>Veh-IR</b><br><b>(gerbil 1)</b> | <b>AU-IR</b><br><b>(gerbil 1)</b> |
|--------------------------------------|-------------------------------------|------------------------------------|-----------------------------------|
|--------------------------------------|-------------------------------------|------------------------------------|-----------------------------------|

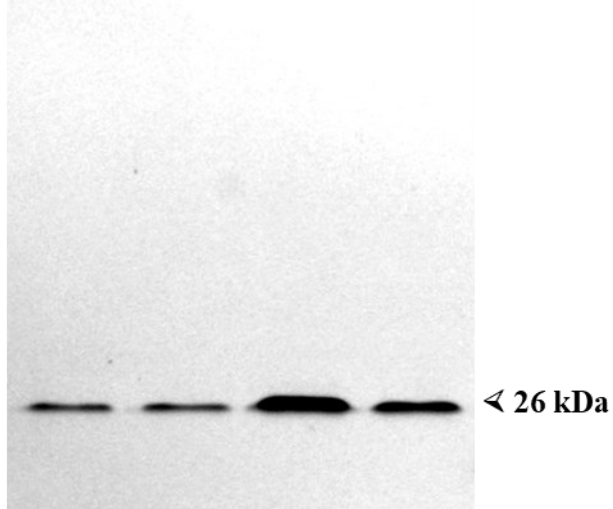

| <b>Veh-sham</b><br><b>(gerbil 2)</b> | <b>Veh-sham</b><br><b>(gerbil 3)</b> | <b>AU-sham</b><br><b>(gerbil 2)</b> | <b>AU-sham</b><br><b>(gerbil 3)</b> | <b>Veh-IR</b><br><b>(gerbil 2)</b> | <b>Veh-IR</b><br><b>(gerbil 3)</b> | <b>AU-IR</b><br><b>(gerbil 2)</b> | <b>AU-IR</b><br><b>(gerbil 3)</b> |
|--------------------------------------|--------------------------------------|-------------------------------------|-------------------------------------|------------------------------------|------------------------------------|-----------------------------------|-----------------------------------|
|--------------------------------------|--------------------------------------|-------------------------------------|-------------------------------------|------------------------------------|------------------------------------|-----------------------------------|-----------------------------------|

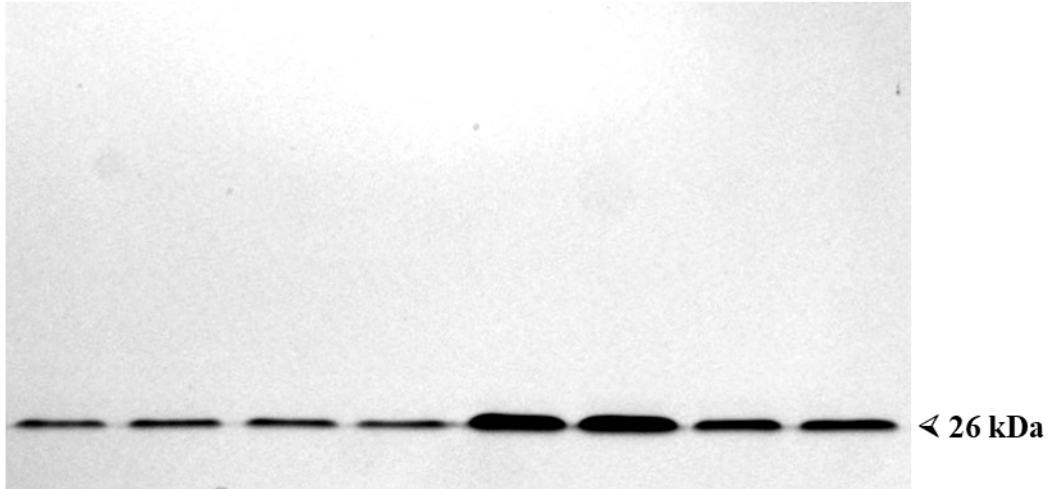

| <b>Veh-sham</b><br><b>(gerbil 4)</b> | <b>Veh-sham</b><br><b>(gerbil 5)</b> | <b>AU-sham</b><br><b>(gerbil 4)</b> | <b>AU-sham</b><br><b>(gerbil 5)</b> | <b>Veh-IR</b><br><b>(gerbil 4)</b> | <b>Veh-IR</b><br><b>(gerbil 5)</b> | <b>AU-IR</b><br><b>(gerbil 4)</b> | <b>AU-IR</b><br><b>(gerbil 5)</b> |
|--------------------------------------|--------------------------------------|-------------------------------------|-------------------------------------|------------------------------------|------------------------------------|-----------------------------------|-----------------------------------|
|--------------------------------------|--------------------------------------|-------------------------------------|-------------------------------------|------------------------------------|------------------------------------|-----------------------------------|-----------------------------------|

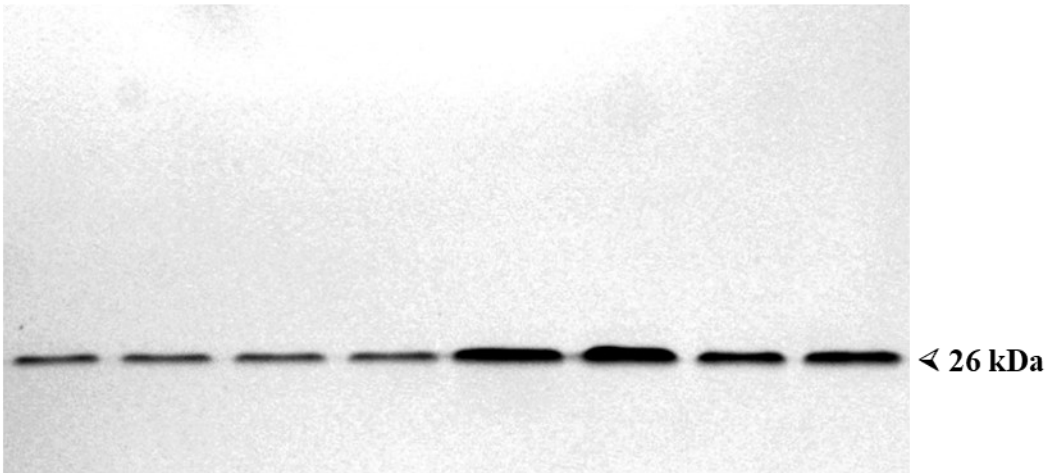

**Figure S4.  $\beta$ -actin for TNF $\alpha$**

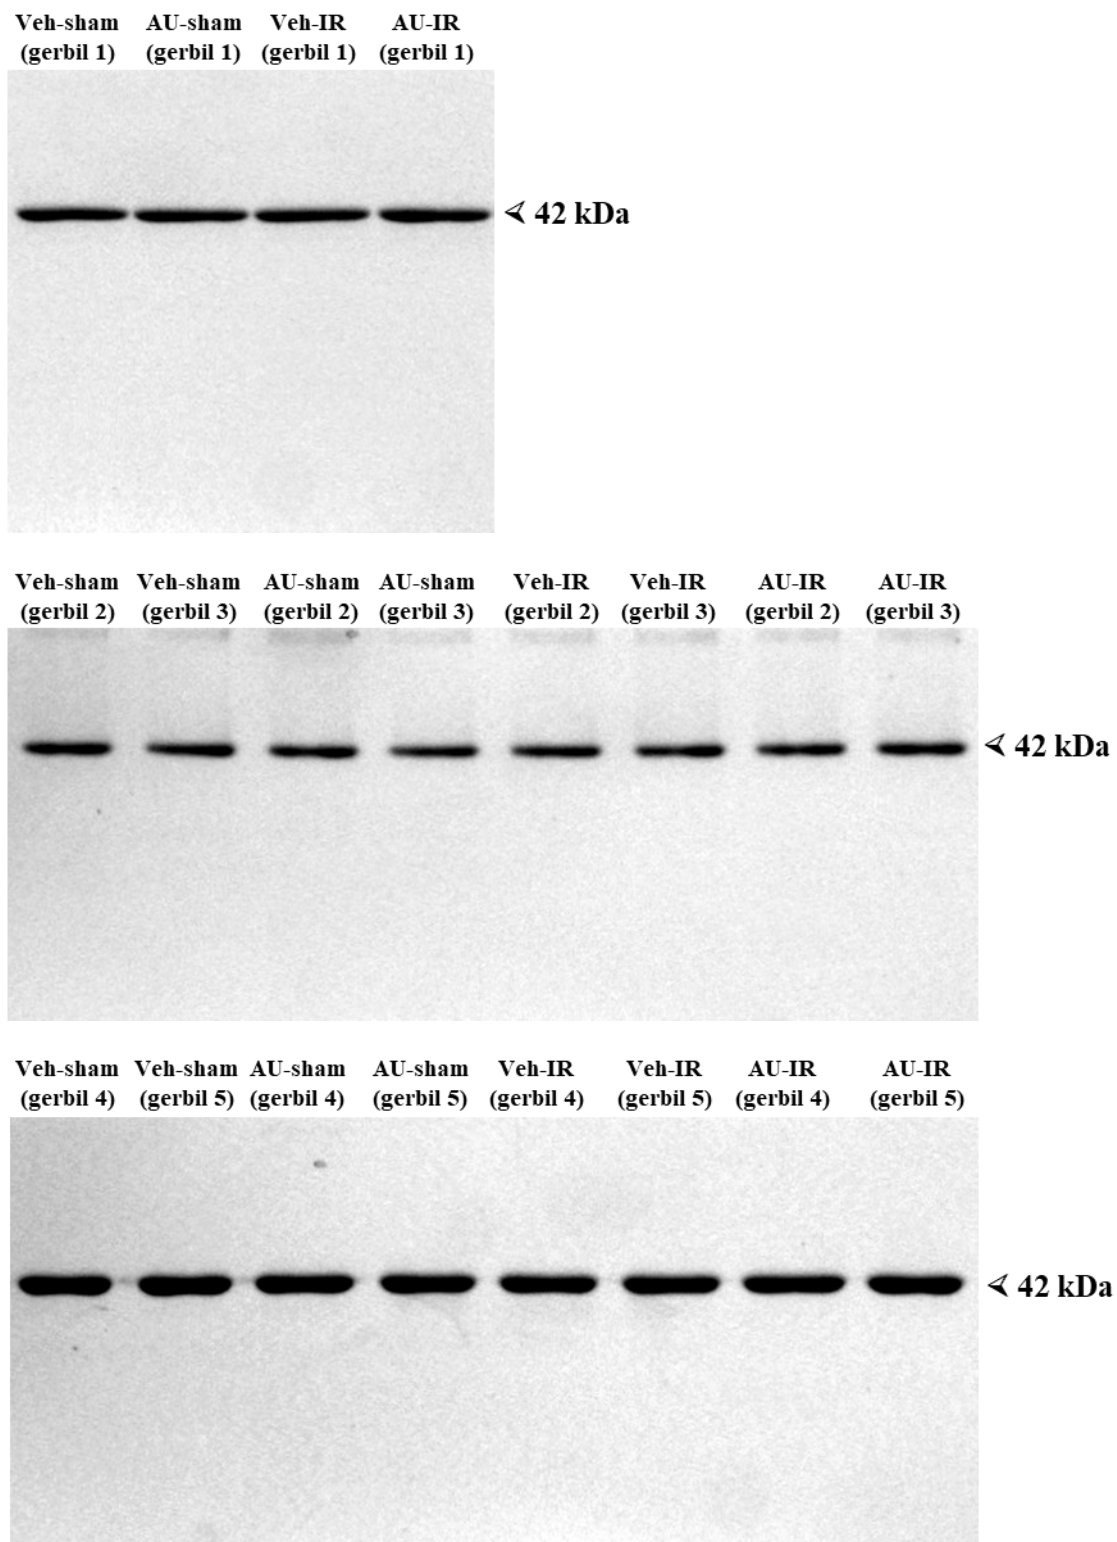

**Supplementary Figures S1-4.** Original images of Western blot data in Figure 3C,D

**Figure S5. TLR4**

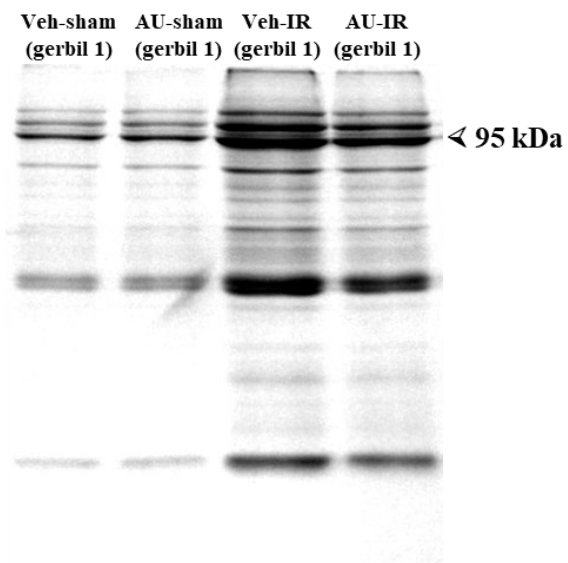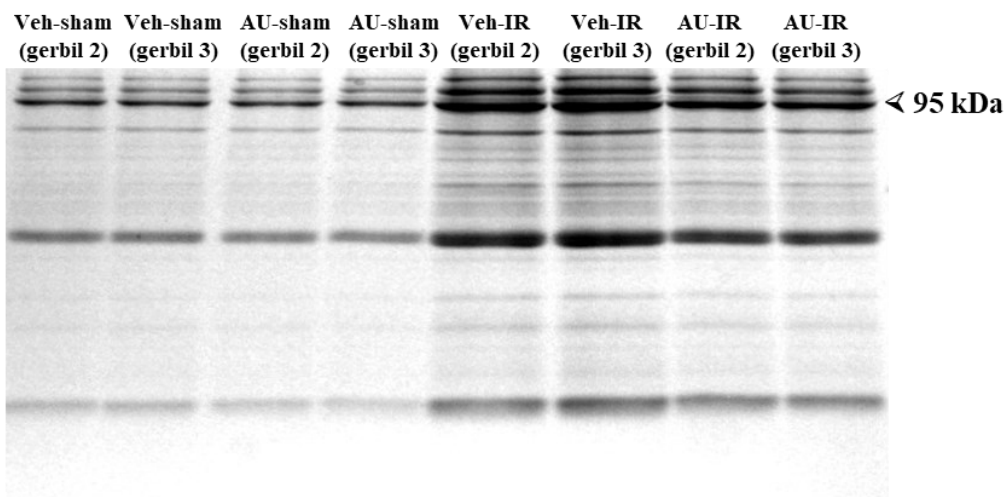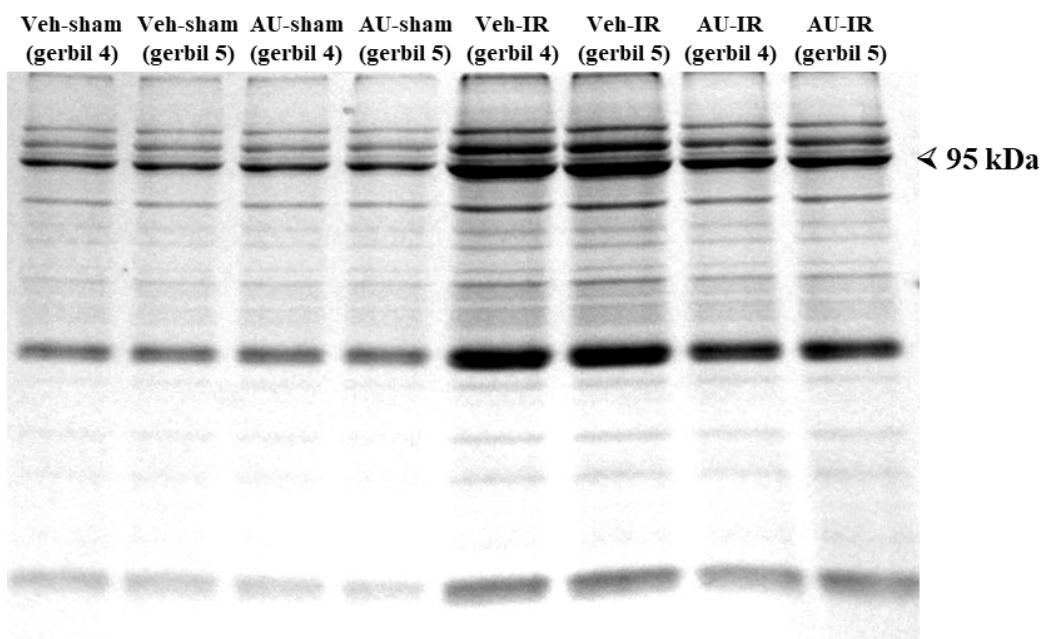

**Figure S6.  $\beta$ -actin for TLR4**

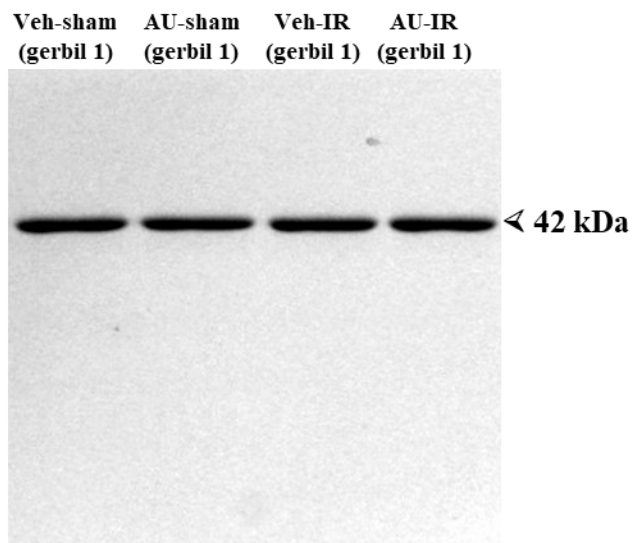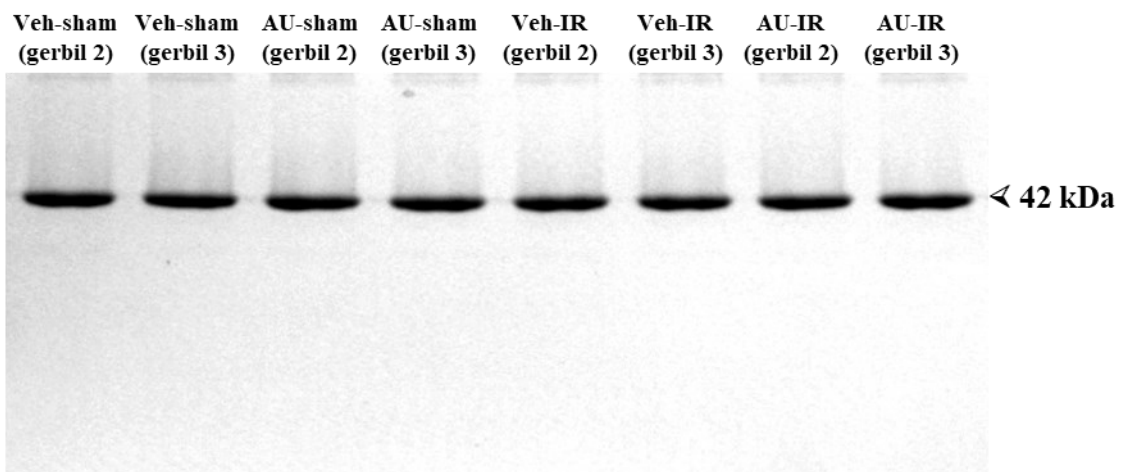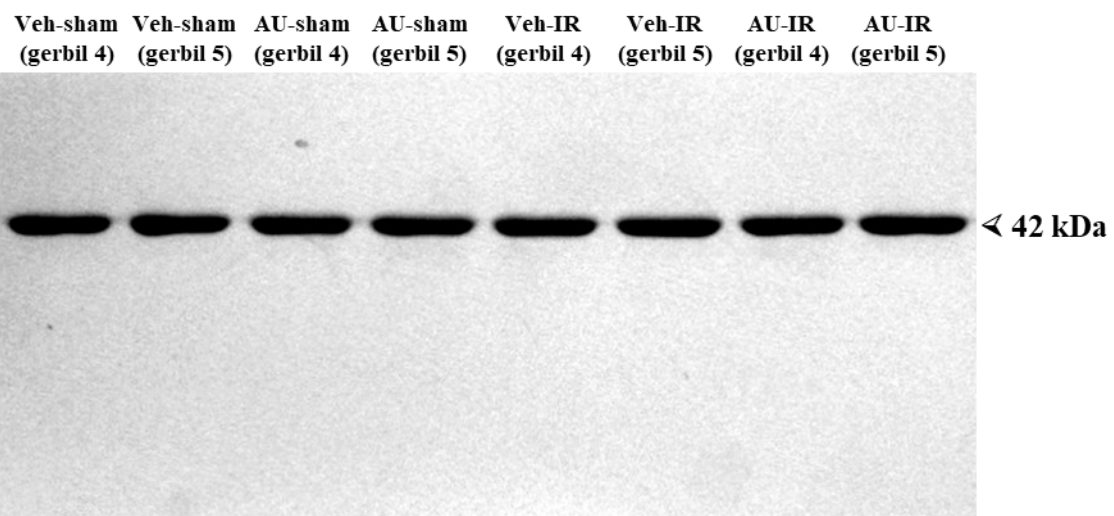

**Figure S7. I $\kappa$ B $\alpha$**

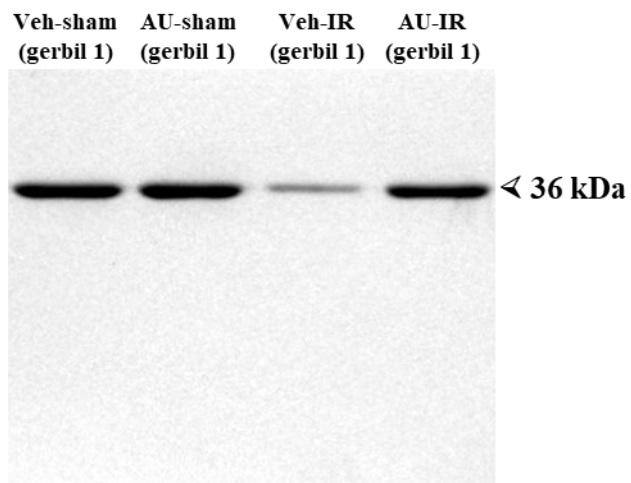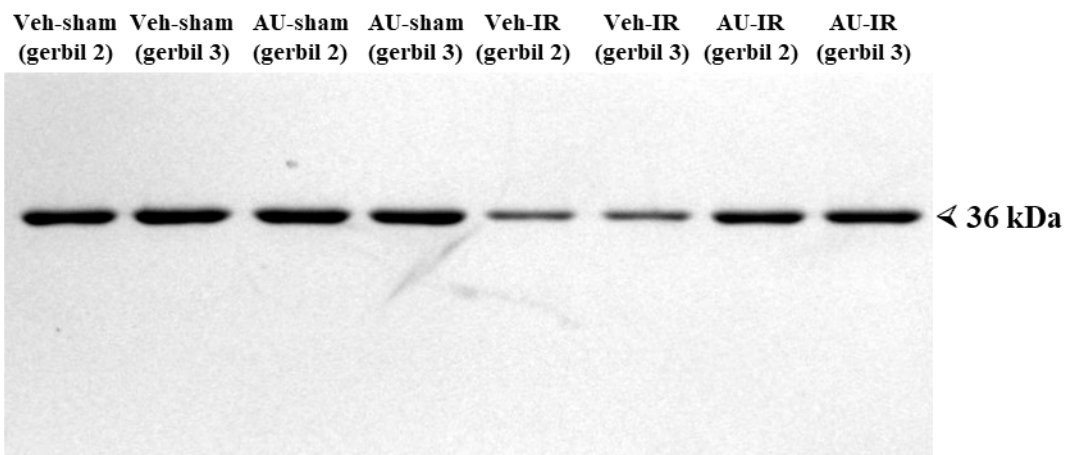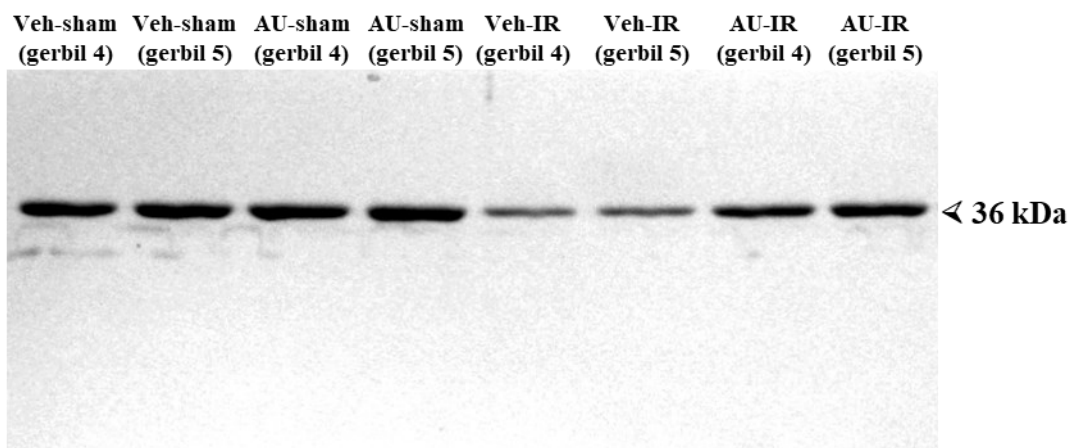

**Figure S8.  $\beta$ -actin for IkB $\alpha$**

**Veh-sham   AU-sham   Veh-IR   AU-IR**  
**(gerbil 1)   (gerbil 1)   (gerbil 1)   (gerbil 1)**

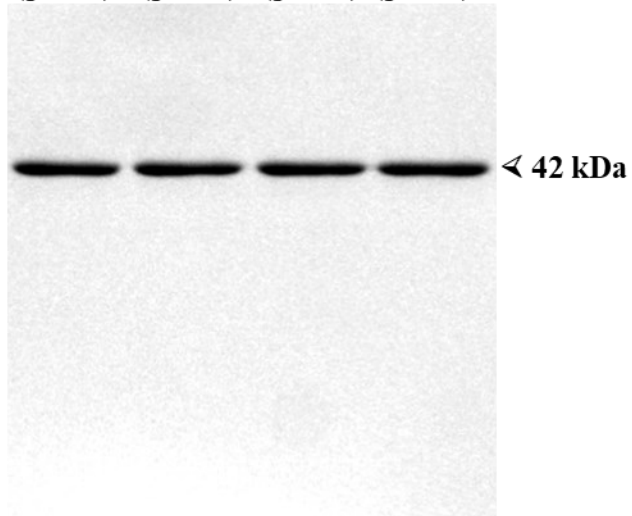

**Veh-sham   Veh-sham   AU-sham   AU-sham   Veh-IR   Veh-IR   AU-IR   AU-IR**  
**(gerbil 2)   (gerbil 3)   (gerbil 2)   (gerbil 3)   (gerbil 2)   (gerbil 3)   (gerbil 2)   (gerbil 3)**

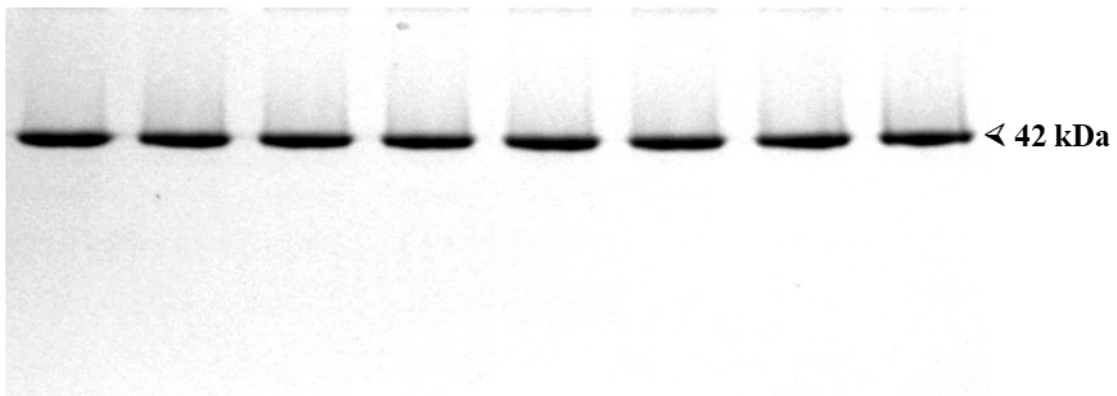

**Veh-sham   Veh-sham   AU-sham   AU-sham   Veh-IR   Veh-IR   AU-IR   AU-IR**  
**(gerbil 4)   (gerbil 5)   (gerbil 4)   (gerbil 5)   (gerbil 4)   (gerbil 5)   (gerbil 4)   (gerbil 5)**

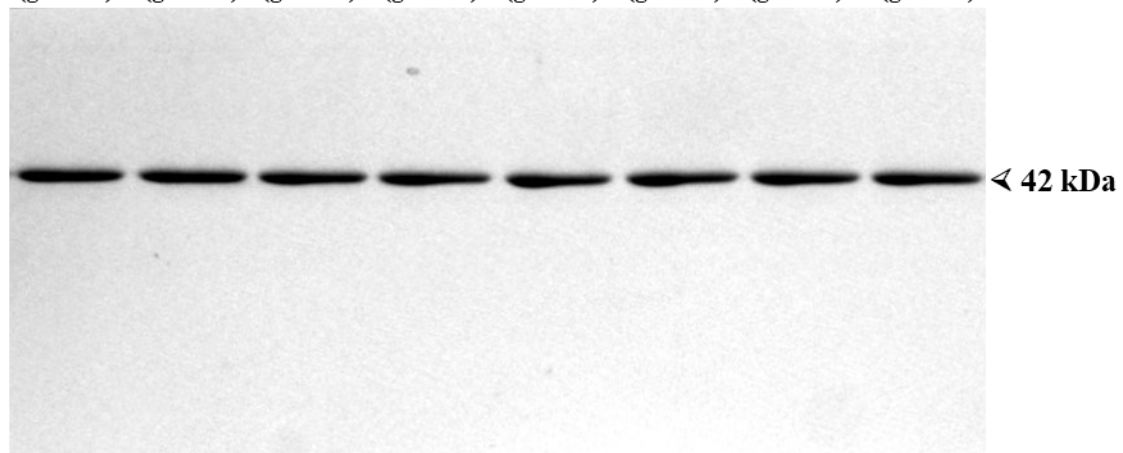



**Figure S9. n-NF- $\kappa$ B**

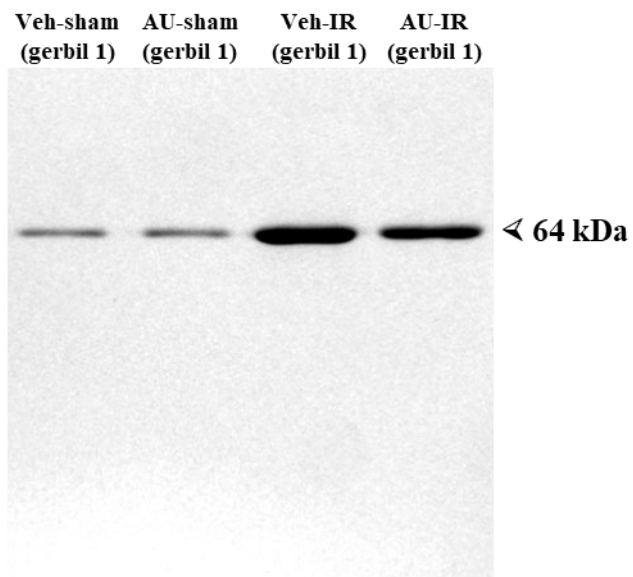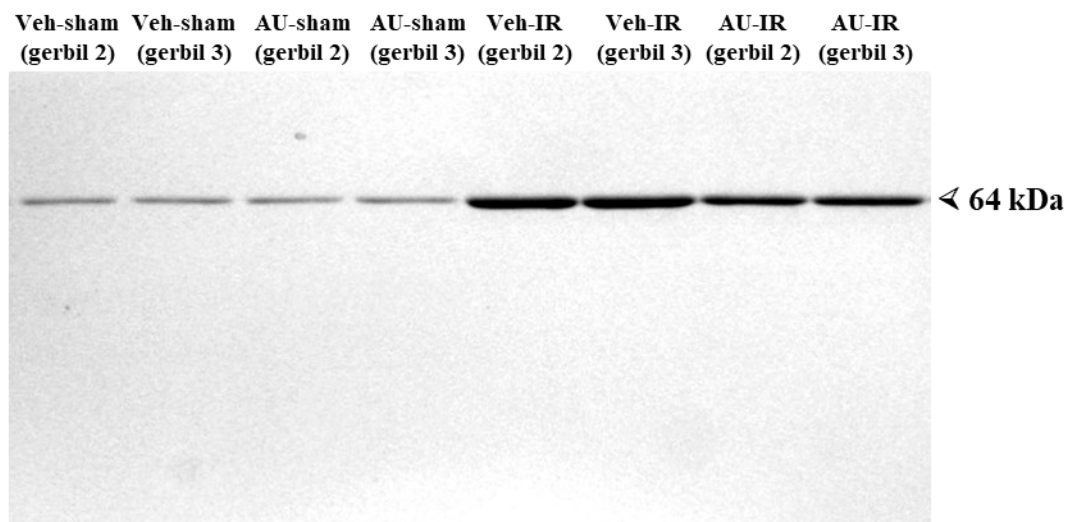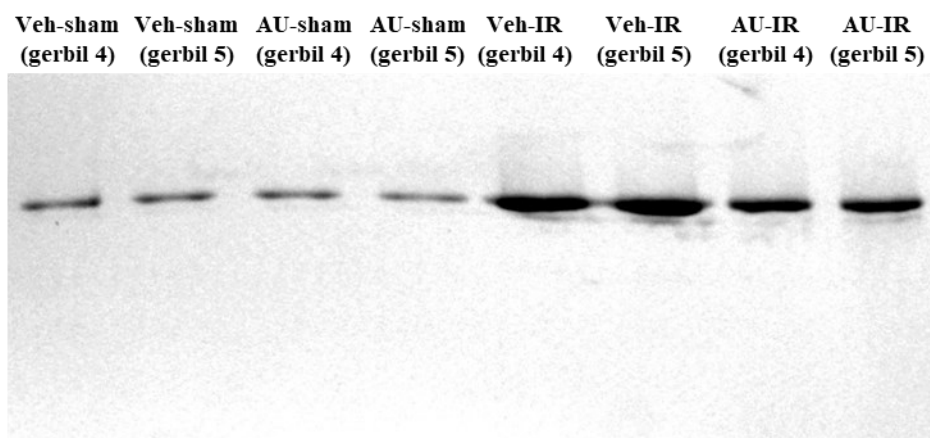

**Figure S10. Lamin B for n-NF- $\kappa$ B**

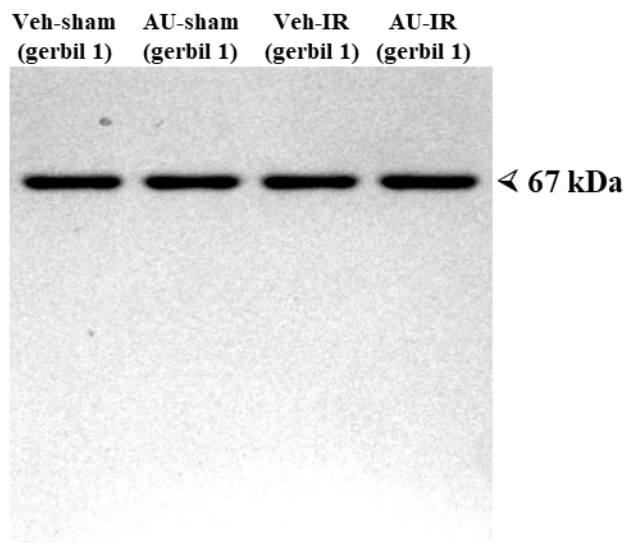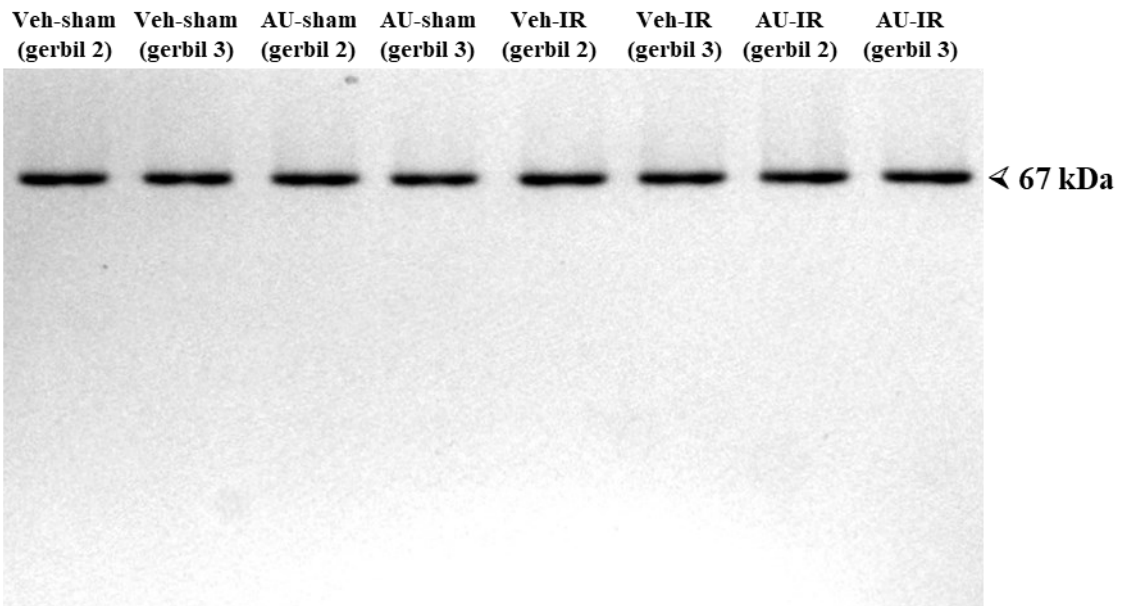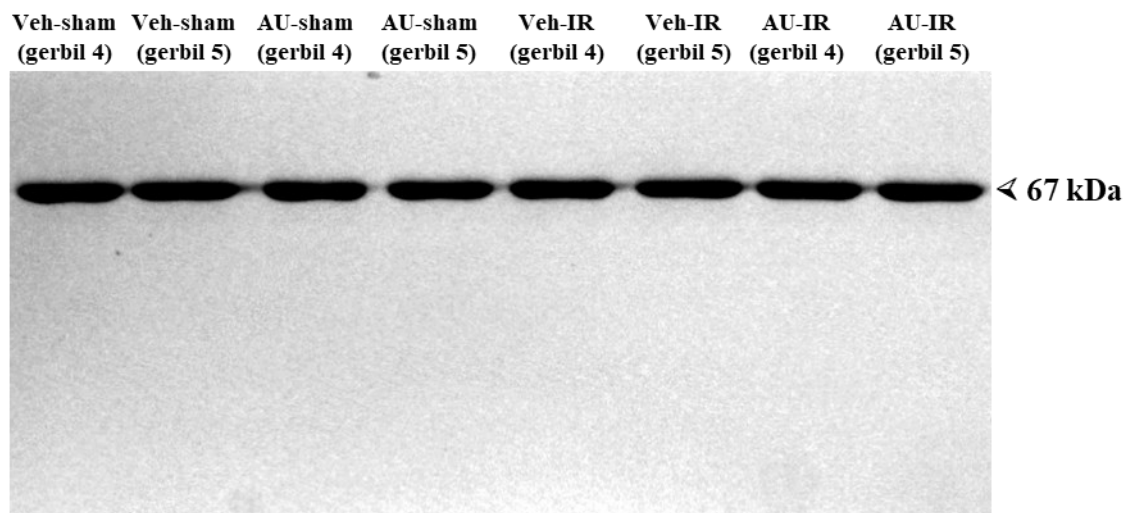

**Figure S11. c-NF-κB**

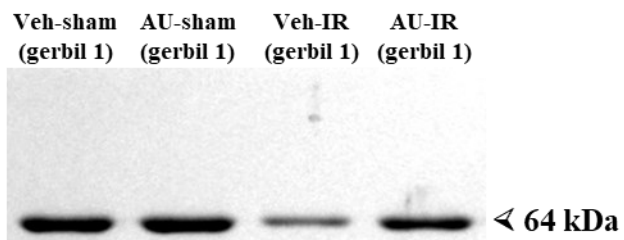

| Veh-sham<br>(gerbil 2)                                                              | Veh-sham<br>(gerbil 3) | AU-sham<br>(gerbil 2) | AU-sham<br>(gerbil 3) | Veh-IR<br>(gerbil 2) | Veh-IR<br>(gerbil 3) | AU-IR<br>(gerbil 2) | AU-IR<br>(gerbil 3) |
|-------------------------------------------------------------------------------------|------------------------|-----------------------|-----------------------|----------------------|----------------------|---------------------|---------------------|
| 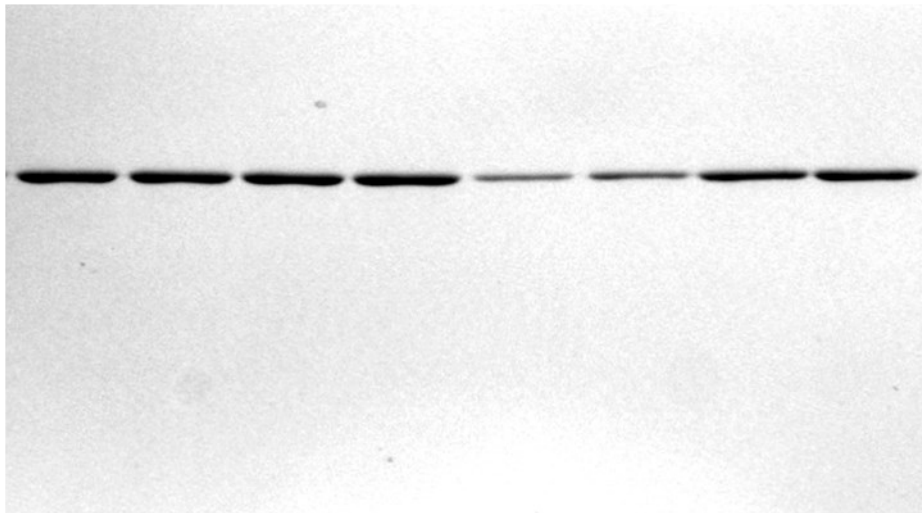 |                        |                       |                       |                      |                      |                     |                     |

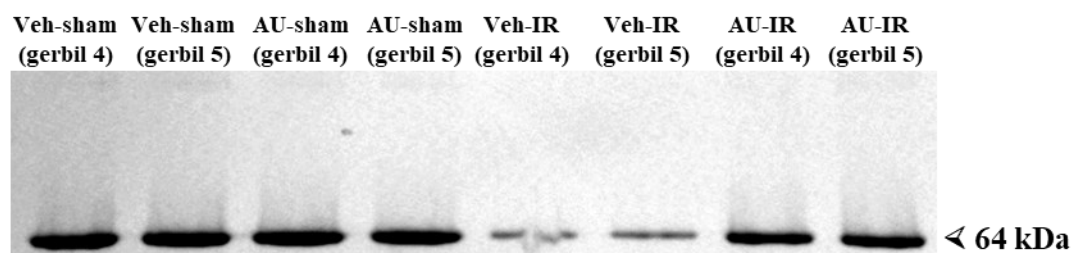

**Figure S12.  $\beta$ -actin for c-NF- $\kappa$ B**

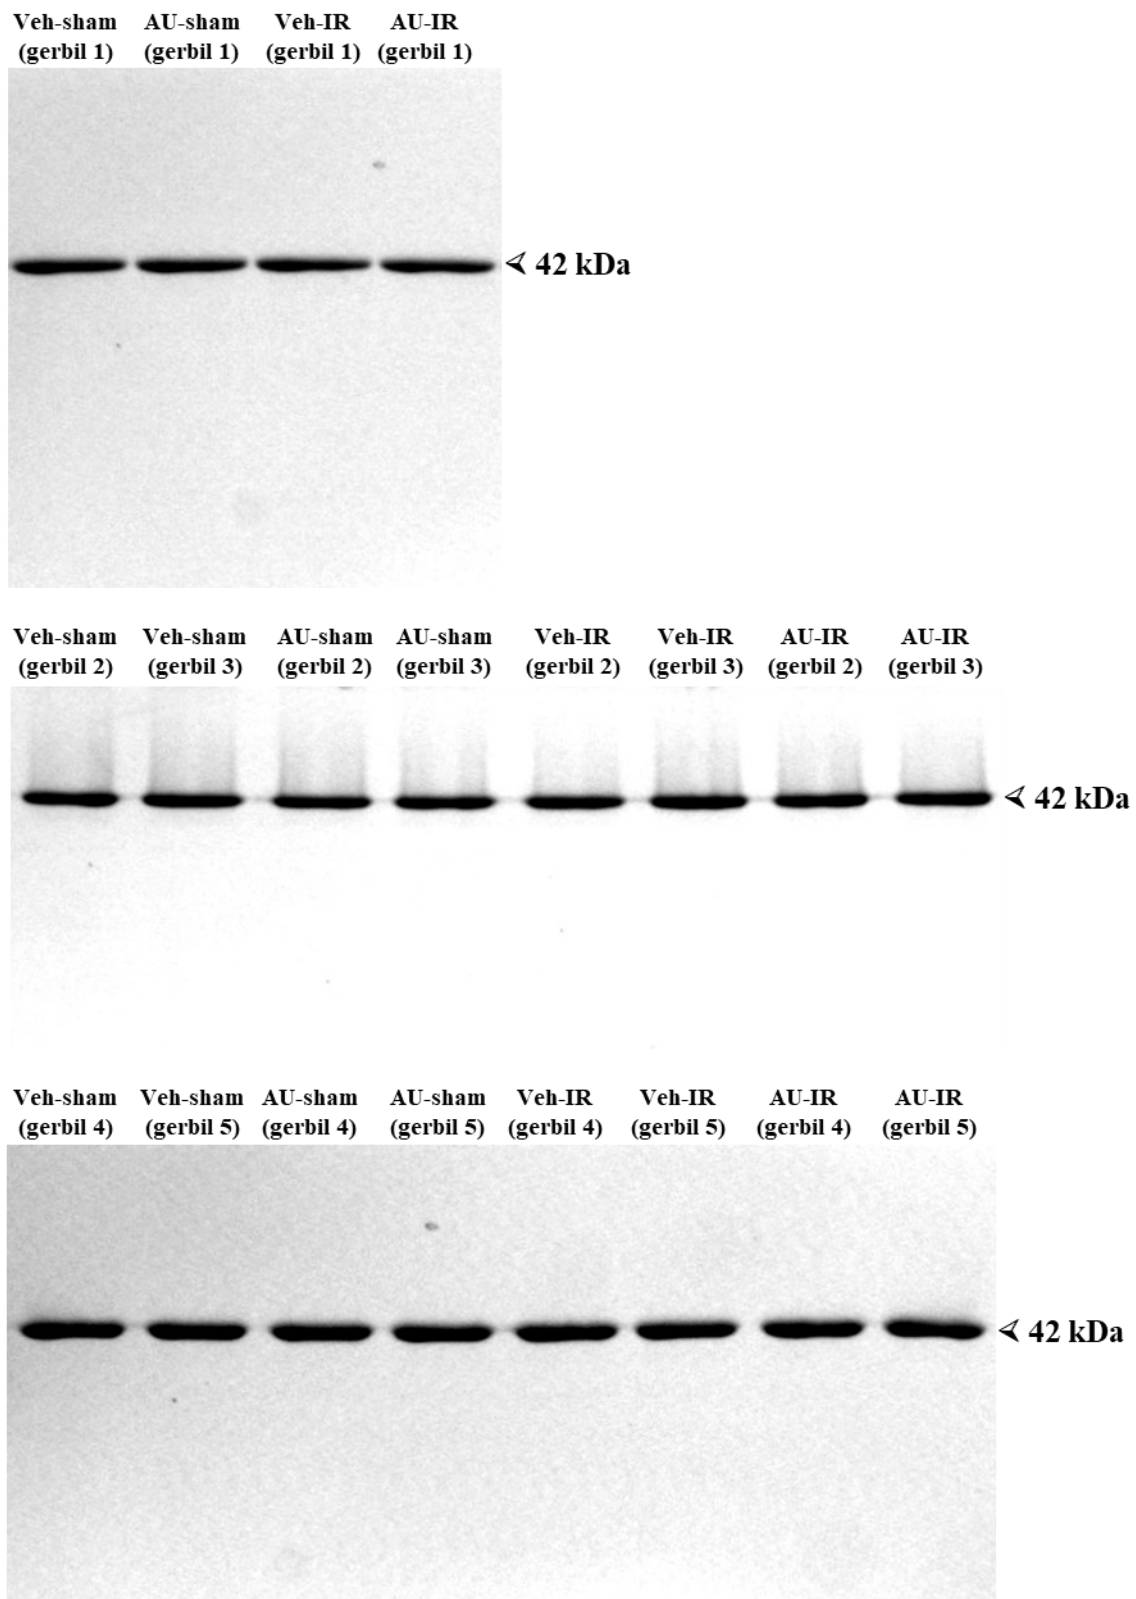

**Supplementary Figures S5-12.** Original images of Western blot data in Figure 4
